# Supplementary material
Source: Royal Society of Chemistry journal article supplement (doi:10.1039/d6gc01028h)
Supplement: d6gc01028h1.pdf [file d6gc01028h1.pdf]

## *Supplementary Information*

### **Production of polyols from sugars in biorenewable alcohol: Selectivity of hydrogen transfer on metal catalysts**

Qiaozhi Zhang<sup>1,2</sup>, Zhuoyue Liu<sup>1</sup>, Xuan Li<sup>1</sup>, Iris KM Yu<sup>1,2,\*</sup>

1 Department of Civil and Environmental Engineering, National University of Singapore, Singapore, Singapore

2 NUS Environmental Research Institute, National University of Singapore, Singapore, Singapore

\*Corresponding author: [irisyu@nus.edu.sg](mailto:irisyu@nus.edu.sg)

*This document contains 6 figures, 1 table, and 2 texts.*

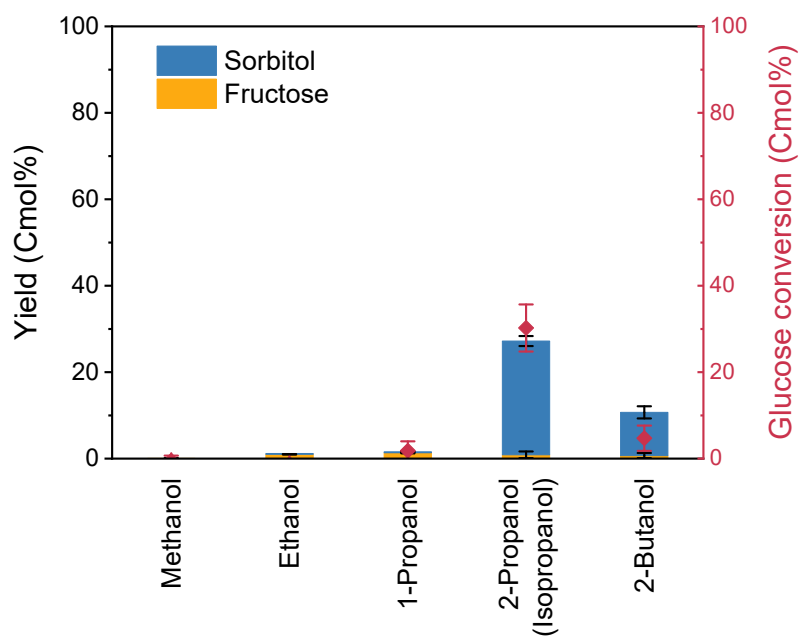

**Figure S1.** Glucose conversion and yields of fructose and sorbitol using various H donors for glucose CTH over pristine Ru/C catalyst (reaction conditions: 40 mg Ru/C, 40 mg glucose; solvent: 5 mL H donor and 5 mL water; 140°C, 30 min; Flexiwave).

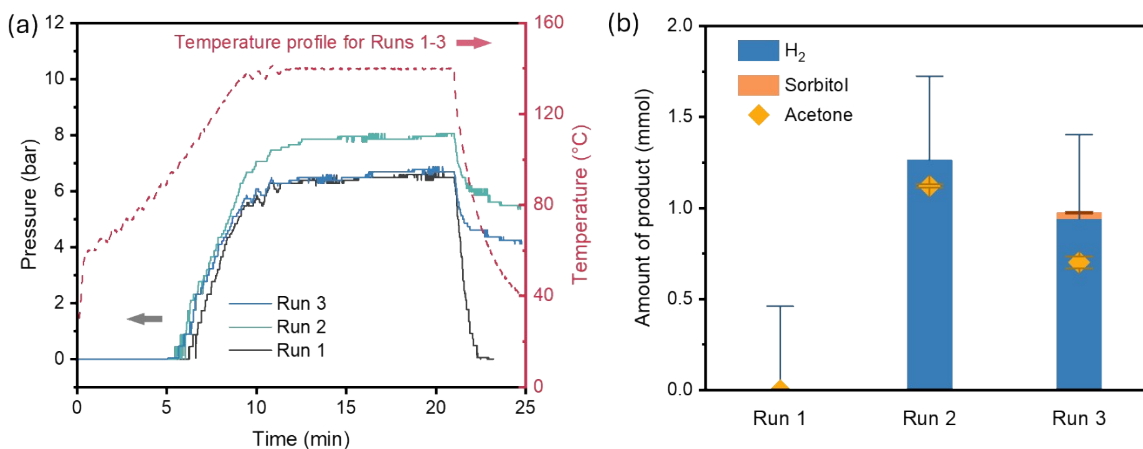

**Figure S2.** (a) Pressure and temperature profiles of solvent-only Run 1 (without catalyst or glucose), Run 2 with 16 mg Ru/C, and Run 3 with both 16 mg Ru/C and 16 mg glucose (solvent in all runs: 2 mL IPA and 2 mL water); (b) H balance after glucose CTH reaction – acetone amount indicates the donated H from IPA, while sorbitol amount represents the H utilized by glucose and H<sub>2</sub> amount (estimated based on post-reaction pressure after cooling down to 40°C using idea gas law) corresponds to the combined H (above runs conducted in Monowave 400, whose instrumental pressure error of  $\pm 2$  bar causing  $\pm 0.46$  mmol estimation error of H<sub>2</sub>).

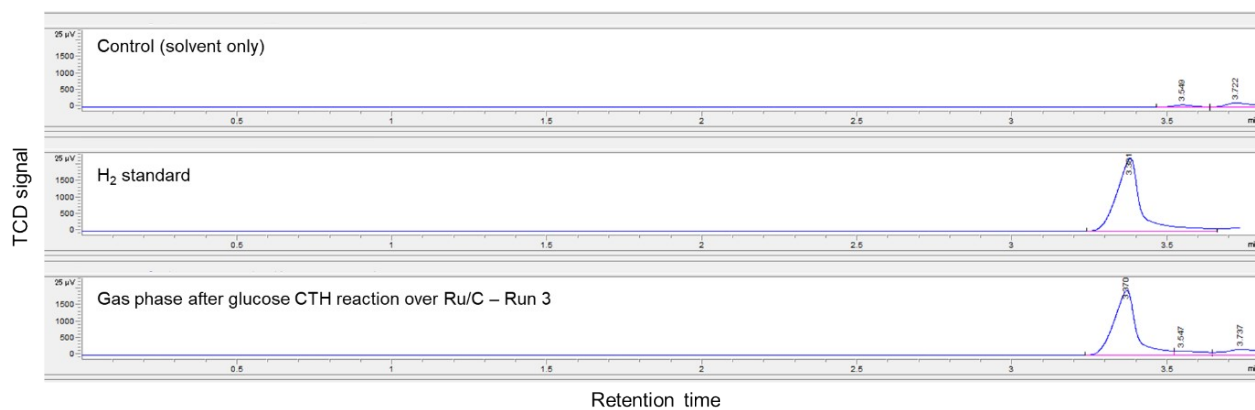

**Figure S3.** GC chromatogram of gas phase after glucose CTH reaction (16 mg glucose, 16 mg Ru/C, 2 mL IPA and 2 mL water; 140°C, 10 min; Monowave 400) with reference to the top gas of solvent-only control and H<sub>2</sub> standard.

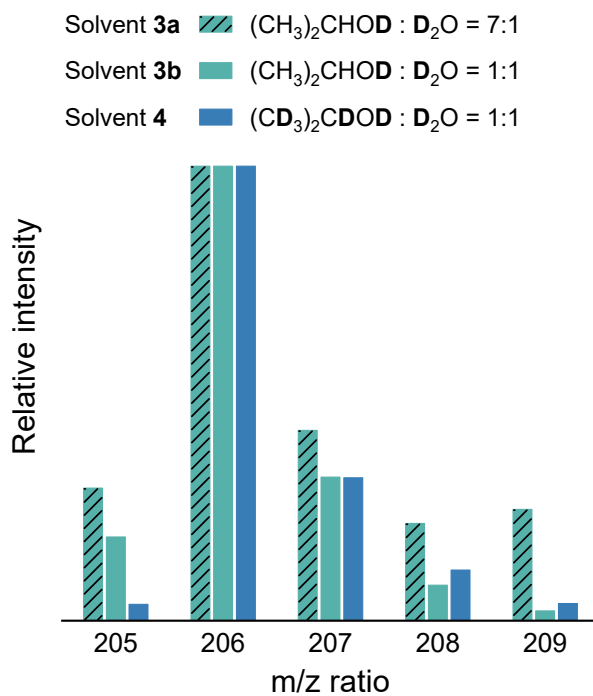

**Figure S4.** ESI-MS profile of products from glucose CTH in various D-labelled solvents with low and high water contents (Reaction conditions: 16 mg glucose, 16 mg Ru/C, 4 mL total volume of solvent; 140 °C, 10 min; Monowave 400. Assignment of main adducts: m/z 205 for [C<sub>6</sub>H<sub>14</sub>O<sub>6</sub>+Na]<sup>+</sup>, m/z 206 for [C<sub>6</sub>H<sub>13</sub>DO<sub>6</sub>+Na]<sup>+</sup>, and m/z 207 for [C<sub>6</sub>H<sub>12</sub>D<sub>2</sub>O<sub>6</sub>+Na]<sup>+</sup>).

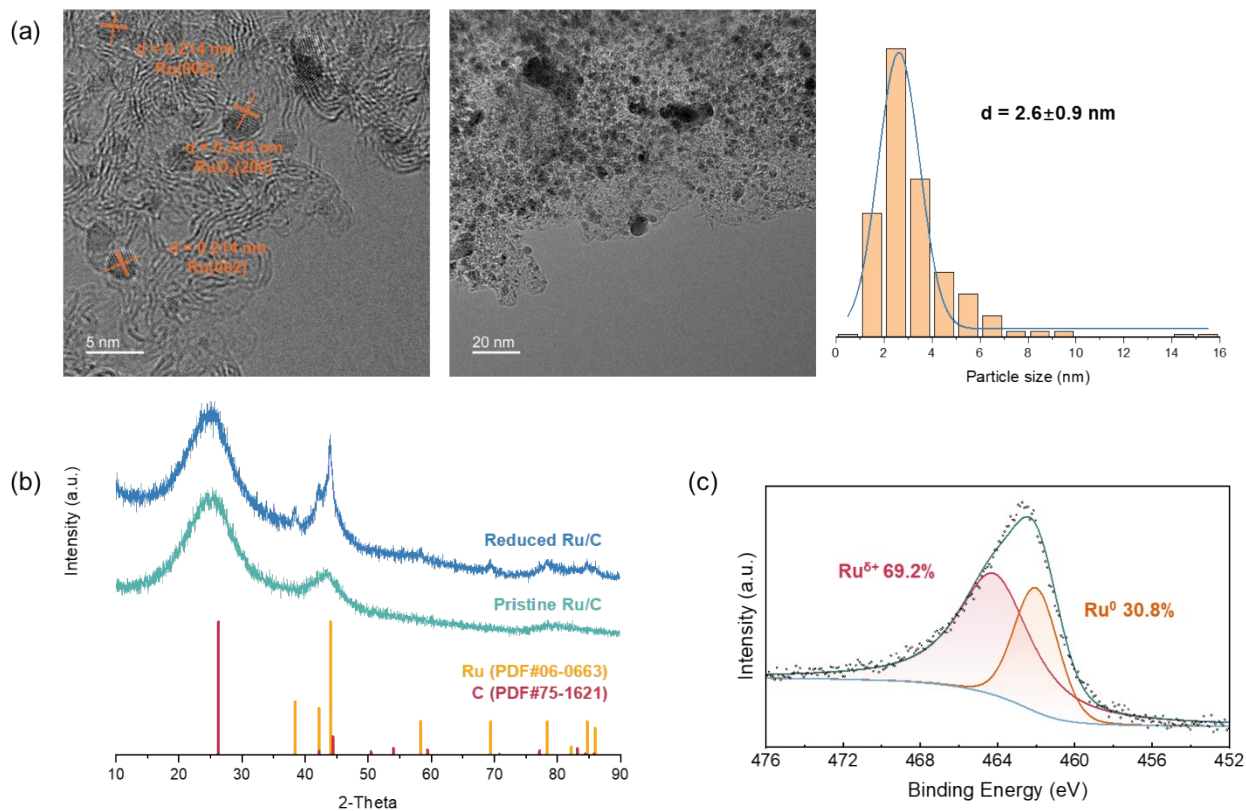

**Figure S5.** Characterization of reduced Ru/C: (a) TEM images with typical lattice spacing (Ru PDF#06-0663 and RuO<sub>2</sub> PDF#50-1428) and particle size distribution; (b) XRD patterns with peak references; and (c) deconvoluted Ru 3p XPS spectra.

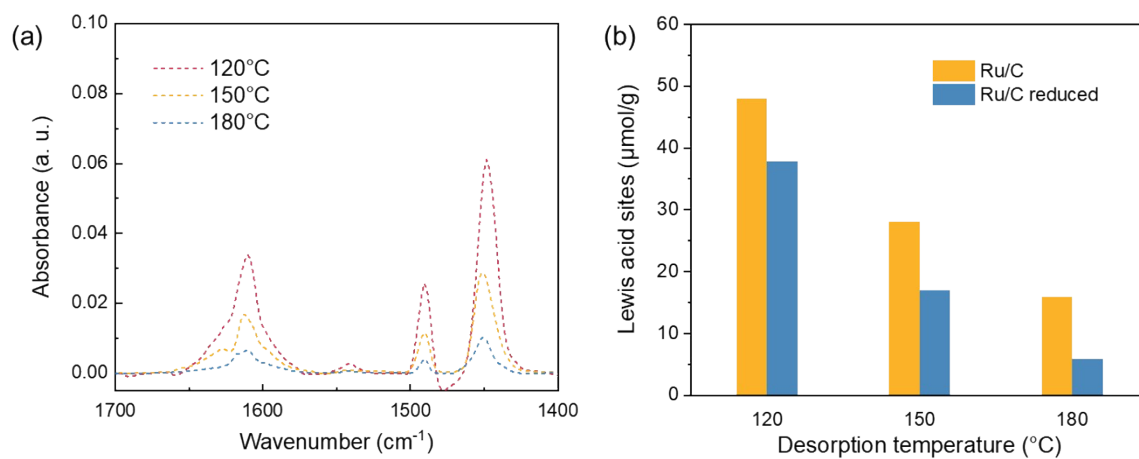

**Figure S6.** Pyridine-FTIR spectra of (a) reduced Ru/C at various pyridine desorption temperatures, and (b) Lewis acid site concentrations of pristine and reduced Ru/C quantified based on the spectra shown in (a).

**Table S1.** Comparison with reported catalytic performance of Ru-based catalyst for the CTH of glucose and representative biomass-derived molecules.

| Catalyst                                                                                                                            | Substrate                              | H donor and solvent                                             | Reaction conditions                                                | Catalytic performance                                                            | Ref.       |
|-------------------------------------------------------------------------------------------------------------------------------------|----------------------------------------|-----------------------------------------------------------------|--------------------------------------------------------------------|----------------------------------------------------------------------------------|------------|
| 2%Ru supported on N-doped ordered mesoporous carbon (CMK-1), 10 mg                                                                  | Glucose 45 mM                          | IPA 2 mL, water 2 mL                                            | Temperature 170°C, Time 3 h, P(N <sub>2</sub> ) 15 bar             | Glucose conversion 100 %, sorbitol yield 99.58 %                                 | [1]        |
| Ru(II) complexes of aminomethylphosphine ligands supported on Fe <sub>3</sub> O <sub>4</sub> @SiO <sub>2</sub> (core@shell), 100 mg | Glucose 1 mmol                         | IPA 10 mL, water 15 mL, K <sub>2</sub> CO <sub>3</sub> 0.1 mmol | Temperature 150°C (microwave), Time 40 min                         | Glucose conversion 99.11 %, sorbitol yield ~96.3 %                               | [2]        |
| 2%Ru supported on activated charcoal powder, 100 mg                                                                                 | Glucose 324 mg                         | IPA 20 mL, water 20 mL                                          | Temperature 180°C, Time 20 min, P(Ar) 15 bar (at room temperature) | Glucose conversion 82 %, sorbitol yield ~76%                                     | [3]        |
| 5%Ru supported on carbon, 100 mg                                                                                                    | 5-(hydroxymethyl)furfural (HMF) 240 mg | IPA 24 mL                                                       | Temperature 150°C, Time 6 h, P(N <sub>2</sub> ) 20.4 bar           | HMF conversion ~80%<br>2,5-bis(hydroxymethyl)furan (BHMF) yield 38%              | [4]        |
| 5%Ru supported on carbon, 100 mg                                                                                                    | Furfural 1 wt%                         | IPA 24 mL                                                       | Temperature 180°C, Time 10 h, P(N <sub>2</sub> ) 20.4 bar          | Furfural conversion 95%,<br>fufural alcohol yield ~1%,<br>methyl furan yield 61% | [5]        |
| 3%Ru supported on mesoporous NiAl <sub>2</sub> O <sub>4</sub> materials, 80 mg                                                      | Guaiacol 0.167 g                       | IPA 4 mL, water 6 mL                                            | Temperature 200°C, Time 2 h, P(Ar) 7 bar                           | Guaiacol conversion 86.54 %,<br>cyclohexanol yield 63.98 %                       | [6]        |
| 5%Ru supported on carbon, 16 mg                                                                                                     | Glucose 16 mg                          | IPA 2 mL, water 2 mL                                            | Temperature 140°C (microwave), Time 20 min                         | Glucose conversion 87.5 %,<br>sorbitol yield 82.8 %                              | This study |

**Text S1.** Establishment of kinetic model (1)

A Langmuir-Hinshelwood model is considered for the studied heterogeneous catalytic system:

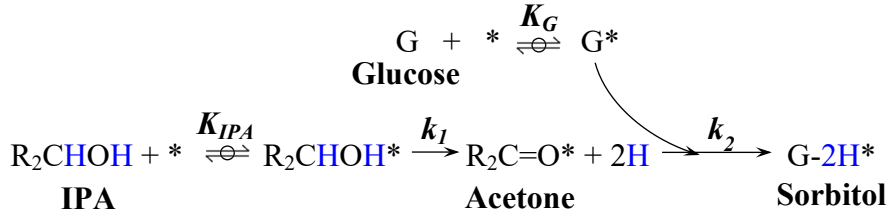

**Scheme S1.** Reaction network for glucose CTH with IPA as the H donor.  $K_G$  – equilibrium constant of glucose adsorption;  $K_{IPA}$  – equilibrium constant of IPA adsorption;  $k_1$  – rate constant of IPA dehydrogenation;  $k_2$  – rate constant of H addition to glucose to form sorbitol.

Considering the balance of the coverages ( $\theta$ ) of empty site (\*), glucose (G), and IPA:

$$\theta_* + \theta_G + \theta_{IPA} = 1 \quad (\text{Eqn. S1})$$

Assumption: both IPA and glucose are adsorbed on the same site, i.e.,  $\text{Ru}^0$  (competitive adsorption).

Considering the adsorption equilibrium constants according to Langmuir equation:

$$K_G = \frac{\theta_G}{C_G \theta_*} \qquad \theta_G = K_G C_G \theta_* \quad (\text{Eqn. S2a})$$

$$K_{IPA} = \frac{\theta_{IPA}}{C_{IPA} \theta_*} \qquad \theta_{IPA} = K_{IPA} C_{IPA} \theta_* \quad (\text{Eqn. S2b})$$

Substituting Eqn. S2a and S2b into the coverage balance (Eqn. S1):

$$\theta_* + K_G C_G \theta_* + K_{IPA} C_{IPA} \theta_* = 1$$

$$\theta_* = \frac{1}{1 + K_G C_G + K_{IPA} C_{IPA}} \quad (\text{Eqn. S3})$$

Substituting Eqn. S3 into Eqn. S2a and S2b:

$$\theta_G = \frac{K_G C_G}{1 + K_G C_G + K_{IPA} C_{IPA}} \quad (\text{Eqn. S4a})$$

$$\theta_{IPA} = \frac{K_{IPA} C_{IPA}}{1 + K_G C_G + K_{IPA} C_{IPA}} \quad (\text{Eqn. S4b})$$

The rate of IPA dehydrogenation (denoted as  $r_1$ ) as well as the rate of sorbitol formation ( $r_2$ ) can be expressed as follows:

$$r_1 = k_1 \theta_{IPA}$$

$$r_1 = r_2$$

$$r_1 = r_2 = \frac{k_1 K_{IPA} C_{IPA}}{1 + K_G C_G + K_{IPA} C_{IPA}} \quad (\text{Eqn. S5})$$

**Text S2.** Establishment of kinetic model (2).

This model is adapted from model (1) described in **Text S1**, considering combination of \*H atoms as a competitive path in parallel with H\* addition to glucose. As both models (1) and (2) share the same quasi-equilibrated steps, **Eqn. S1-4** that describes coverages and equilibrium constants apply in both models.

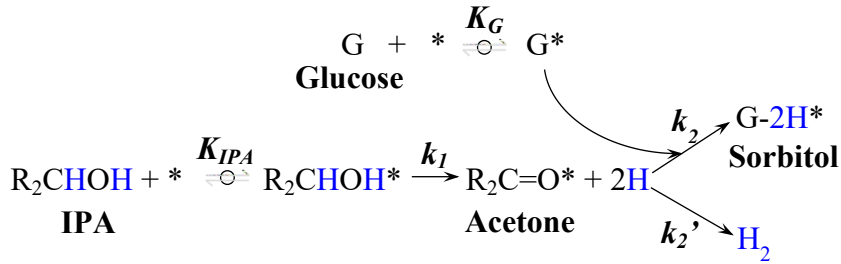

**Scheme S2.** Reaction network for glucose CTH with IPA as the H donor.  $K_G$  – equilibrium constant of glucose adsorption;  $K_{IPA}$  – equilibrium constant of IPA adsorption;  $k_1$  – rate constant of IPA dehydrogenation;  $k_2$  – rate constant of H addition to glucose to form sorbitol;  $k_2'$  – rate constant of H-H combination into  $\text{H}_2$ .

Since sorbitol formation (rate denoted as  $r_2$ ) and  $\text{H}_2$  formation (rate denoted as  $r_2'$ ) are parallel, competitive steps, the following relationship applies:

$$\begin{aligned}
 r_1 &= r_2 + r_2' \\
 r_2' &= r_1 - r_2
 \end{aligned} \tag{Eqn. S6}$$

The rate equations for  $r_2$  and  $r_2'$  and their ratio:

$$\begin{aligned}
 r_2 &= k_2 \theta_G \theta_H^2 \\
 r_2' &= k_2' \theta_H^2 \\
 \frac{r_2}{r_2'} &= \frac{k_2 \theta_G \theta_H^2}{k_2' \theta_H^2} = \frac{k_2 \theta_G}{k_2'}
 \end{aligned} \tag{Eqn. S7}$$

Substituting Eqn. S6 into S7:

$$\frac{r_2}{r_1 - r_2} = \frac{k_2 \theta_G}{k_2'}$$

$$r_2 k_2' = r_1 k_2 \theta_G - r_2 k_2 \theta_G$$

$$r_2 (k_2' + k_2 \theta_G) = r_1 k_2 \theta_G$$

$$r_2 = \frac{r_1 k_2 \theta_G}{k_2' + k_2 \theta_G}$$

(Eqn. S8)

## References

1. Buta, J.G., Z.T. Tefera, and M.T. Alemea, *Ru on N-doped ordered mesoporous carbon support for conversion of glucose to sorbitol via in-situ generated hydrogen species: A greener approach*. *Renewable Energy*, 2025. **240**: p. 122225.
2. Uruş, S., H. Eskalen, M. Çaylar, and M. Akbulut, *Highly effective aldose reductase mimetics: Microwave-assisted catalytic transfer hydrogenation of d-glucose to D-sorbitol with magnetically recoverable aminomethylphosphine-Ru(II) and Ni(II) complexes*. *Journal of Molecular Structure*, 2021. **1237**: p. 130313.
3. Shrotri, A., et al., *Transfer Hydrogenation of Cellulose-based Oligomers over Carbon-supported Ruthenium Catalyst in a Fixed-bed Reactor*. *ChemCatChem*, 2014. **6**(5): p. 1349-1356.
4. Jae, J., W. Zheng, R.F. Lobo, and D.G. Vlachos, *Production of Dimethylfuran from Hydroxymethylfurfural through Catalytic Transfer Hydrogenation with Ruthenium Supported on Carbon*. *ChemSusChem*, 2013. **6**(7): p. 1158-1162.

5. Panagiotopoulou, P. and D.G. Vlachos, *Liquid phase catalytic transfer hydrogenation of furfural over a Ru/C catalyst*. Applied Catalysis A: General, 2014. **480**: p. 17-24.
6. Zhao, Y., et al., *Water-assisted catalytic transfer hydrogenation of guaiacol to cyclohexanol over Ru/NiAl<sub>2</sub>O<sub>4</sub>*. Chemical Engineering Journal, 2024. **485**: p. 149934.
